# Supplementary material for: Metatranscriptomic Analysis Reveals Rich Mycoviral Diversity in Three Major Fungal Pathogens of Rice
Source: MDPI journal article supplement (doi:10.3390/ijms23169192), 2022-08-16
Supplement: s1 [file s1]

**Table S1.** Statistics of assembly sequences from metatranscriptomic sequencing data of three major fungal pathogens of rice.

| Sample           | Raw reads          | Clean reads        | Total contigs | Viral-related contigs |
|------------------|--------------------|--------------------|---------------|-----------------------|
| <i>M. oryzae</i> | $2.16 \times 10^8$ | $2.11 \times 10^8$ | 116,736       | 79                    |
| <i>U. virens</i> | $2.88 \times 10^8$ | $2.84 \times 10^8$ | 106,131       | 593                   |
| <i>R. solani</i> | $7.82 \times 10^7$ | $7.70 \times 10^7$ | 99,590        | 10                    |
