# Supplementary material for: Metatranscriptomic Analysis Reveals Rich Mycoviral Diversity in Three Major Fungal Pathogens of Rice
Source: Int J Mol Sci. 2022 Aug 16;23(16):9192. doi: 10.3390/ijms23169192 (PMC9409214; doi:10.3390/ijms23169192)
Supplement: Supplementary file 1 [file ijms-23-09192-s001.zip › Table S2.xlsx]

## Sheet: Sheet1
Table S2. Specific primer pairs used to confirm viral sequences in three major fungal pathogens of rice
Contig number	Primer name	Primer sequence
First_Contig4	F	TTCATGACAGCTCCAACCACCG
	R	GGTTGCGTCCCTCTTGAAACG
First_Contig8	F	CAGAACCAATTCACGGGATCCG
	R	AATTCTGGAGAGAAGGCGAGAAGT
First_Contig10	F	GGAGAACATTGTGGGCCAGATCA
	R	GACGTAAATCGATCGCCCTCG
Contig500	F	CCATAGACCGCGACGTGG
	R	GGGGCTACTCTGCTGAGCG
First_Contig30	F	AGATCGACTTATCACGTTGGAACCT
	R	CTTCAGTGAAGTGGGGTACTCG
Contig601	F	CCAGGAAAGCAGAACAGACGG
	R	CGATACATCAAGGGGGCGTAGAAC
First_Contig12	F	GTGAGCTTTCGCTTTCACGT
	R	GCGGAAGACTAAGCTTCCCCA
First_Contig96	F	GACTGGTGGCAAGGTTAGGCG
	R	TTACACCATCAGCAAGGTGGTTCAG
Contig28	F	TGGCCTGCTATTCAAGCGCT
	R	CTTTCCCTCTGTTGCAAGCAACG
Contig457	F	ACCCACTCATTCAGATCAGCTCT
	R	AGTTGTTGCCGGGTCTCAC
Contig608	F	GCTGAGATTGACGACCGCAC
	R	TAGATCTGGGCTCGCCCAAC
Contig926	F	CCAGCATTCTCAAGCAACTTGC
	R	TCGATTCCGGAGTCTAGAGGCAAAG
Contig644	F	CTCCGTTGGGCCTTAGTCCT
	R	TCATCGGCCTACAGCCCC
Contig5875	F	TCGCGCCCGCTCTTAAC
	R	TCCTCCAGCTCTTTGAGTGGC
Contig683	F	CAGTCCTCAGGGACGTCGC
	R	TGAGGAGGAGGGGTACTTTTTGCT
First_Contig2	F	ACAAGGACTCTCGAGTTGGAT
	R	CCCAGTGCTTTAACGGTCG
First_Contig21	F	GCAACCACGAATCAGCCC
	R	GATTGCAGGAATCTCATCGTGAG
First_Contig36	F	ACTTTCCTTCCGTCGCAAG
	R	TCTTTTGTGGCTGTCCCGA
First_Contig45	F	ACATGGAACGTATGGTCCTCT
	R	AATTACGCTCTGCGACTTCG
First_Contig46	F	CGCATCGCTCTTACTCTTCCT
	R	ACTCGACTCCCATGTTGTTTTG
First_Contig100	F	TCCTTGCTGCTGTCACTCTG
	R	CTTCGGGAGTAAATCAGTGATGG
First_Contig297	F	GAACCATGCGACCGTGG
	R	CAGGTATTGGCCCAAGGAG
Contig366	F	AATCACCATCCAAACTGCCTAC
	R	CACATTTCGCCATCCAAGCT
Contig470	F	CCATTCCGGTTGGTTCACAGTC
	R	ACTTACGAGGACATCCGTGG
Contig527	F	TCCAACGAACTCTGGAAGAGTT
	R	AAGCTCCTCGTGGTCCAA
FContig52	F	TCGCGCACGGAGATTTCG
	R	AGGATGAGTACTCGCGTTTCCC
Contig66	F	ATGATAGTACGCAGATAAGGTTCGGG
	R	CGAAATCTCCATGCGCGAGATAAAC
Contig75	F	TTTATTCCGACCCGACGGACAC
	R	AGAAAGGGAGACGCTGATCGG
Contig82	F	GAACACAATCCATCATCTCCTATTCAAAGCT
	R	GCCATTCTTCGATGACAGGCAC
Contig96	F	CTGAAGAGAGGCAGACCACG
	R	ATTGCGACGGACGGCC
Contig150	F	TGTATGGAAGCACCCATGCTTGA
	R	CGGAAGGGCAACCCAAAAG
Contig208	F	CAGAGAGTGGCGTCGTCACG
	R	TCGGTCCCAAAGCCACAGC
Contig776	F	GGGTGAATGTGGCTCTGGAGAC
	R	GACACATAGCTCATAAGAGCCTTTGC
Contig989	F	TTGAAAAAGTACATAACTCATAT
	R	CGAAGTACTACTTCGACC
1Second_Contig2	F	ACTTTCCTCTTCCAGATGTCCCC
	R	CCTGCAATTCGATCTGTCCCAC
1First_Contig27	F	CAGAACGAATCAAGGTCGGGG
	R	GCGTTGAGCGAAACTTCTGCT
1First_Contig29	F	AAGCCGAGGAGTCAGGAGAT
	R	TTTGCCAAACGTTTCGTACCGT
1First_Contig37	F	GACTTGAGTAACCGGACCTGC
	R	GATTCCTCGTATCGCTCGAGAGT
1First_Contig43	F	ATTGATGAAGGTCGTCCCTCGG
	R	CGTATGATGCGTTCCTCACTGC
1First_Contig76	F	CACTAGGGGAAAGCTTCCCC
	R	TCAGGGGGATCCTTCCCTCTG
1Contig28	F	CGAACCATCCCAGCTCGAGATT
	R	GTCCTCTAGGCAGTGTCATGCT
1Contig130	F	TTGTGACCTCTTTCTTGGCAAACG
	R	CAGCATCACATTGTACCCCTGC
1Contig341	F	CAGCTTCCAACGCTACACTTACC
	R	ACCCGGAAGGCATACTCTTACC
1Contig408	F	GCGACTTGTTCGAGTAGTTCCC
	R	CATCAGGAACCTGGCCAAGC
1Contig482	F	AGGTCCTAAGAACCTTGTCGGAC
	R	TTTTCCCTGTCTCCTCCCACC
1Contig445	F	CCCTGTACTTCCCCAGTTCAGC
	R	TGGTTTCCCCGTTTAATGGGGAAA
1Contig553	F	GTTATCACGGTGAGTGACCGCG
	R	CCGACATGTTAACACCCTTAGCAG
Second_Contig	F	GCACAATGTGGAGTGATTGCCA
	R	TGTTAGGGCGAGGGGTAGGG
2First_Contig15	F	GGACACGCTCCACAAGCTAGT
	R	CGGTTGGCATGAGGTGACC
2First_Contig23	F	TGTAGGGGGAGCCACCTGAC
	R	TCCTAGATCCTGGGTCGATCGG
2First_Contig32	F	TCACCAGAGAGAGGCTCCCTC
	R	TCTTGCCCACCGAGTTCGTT
2First_Contig49	F	CCTTCAGCGCAAGGGACAC
	R	GCATTCGGACGACCTGATGTG
2First_Contig74	F	GAACATGGCCTTCCGCACG
	R	GGTGAGTTGCTCCCGAACG
2First_Contig77	F	CGATGATTCGGATCCACTGCT
	R	TTTCGTCGGGTCTATCCCGACG
2First_Contig89	F	CCATCATTTGGCCGCGGA
	R	CGTTTTCTCCGAGTTGTCCGG
2First_Contig205	F	ACTATCTCACGATCGGAGGGAC
	R	ATGACGTGTTGAGTGTCGTCG
2Contig235	F	TTTTCACTCGCGGATCGGCG
	R	GAATGAATGTGTACGCGGAGCG
2Contig243	F	TTTCCGGAGGCGGAGGAG
	R	GATGATTGCTTGGCGCTCC
2Contig731	F	CCCCATTACCGCCCCTAACG
	R	GTCGCAGGTCTTGCCAGG
2Contig974	F	GAGACCACTGCGCGCTTG
	R	AGATTAGTATGATCGGCCGCTCG
2Contig1333	F	ATCTCCCAGTGGGCAACAAC
	R	TTTGCGGTTGCTCCTGGC
3Contig1509	F	TTTGTCTCTCGGGGATCGATGG
	R	CCATCACGGTAGCACCTTATGCA
3Contig553	F	GCGGACATAATGCGGCTGT
	R	AATGGCTGGCTGGAAACAGC
3Contig293	F	CCAAAACATCGTGACACCGC
	R	CTTTGGCTTGTGATCCTGGGAG
3Contig151	F	CTCAACCGAGGCAGATTCCAC
	R	GAAGTTCGCAGAGCAGACAAGC
3First_Contig34	F	GGAACCACACGGATCCTCACG
	R	TTCGGCCCCTTCATCATGTGT
2Second_Contig1	F	TCGCTGATTATTCAGAGCCGAGG
	R	CATCCGTGGTGGGATCTGC
3First_Contig10	F	GTGTGAAACCGAGTGGGTAGT
	R	GGCTCCTGTCTTCGTGCGTT
3First_Contig17	F	ACCGTTCGAGAGCGGAGG
	R	CTTGGCCTGCCAATACTCCT
3First_Contig49	F	AGTCCACGTGTCACACTCCG
	R	GTCACGAGGATGTTCAGGCC
3First_Contig19	F	GTGACAGTCACGAGGAAGGCT
	R	TTGAGAACTTGCGGCAGCG
3First_Contig80	F	GTCCGCGATCCTCTGGTATG
	R	TTCACGCCGAAGCGTGC
3First_Contig75	F	CGGGACTGTCGCACAAGA
	R	CGCGAGCTAGCTGCATCAG
3First_Contig72	F	GTCCACGGATCCCCAGACG
	R	GGAGGGAGGTCACGGACTG
3First_Contig5	F	CCGTGCCATATGCTGTTTTAACG
	R	TGTTTCCGATGGGTCTGCC
3First_Contig43	F	ACTACCCTGCCGTTGGG
	R	ATCTCAAGTTCACGAATCGCAGG
3First_Contig38	F	GTTCGGGCGGACCCCA
	R	TCTTGGTCTCAGAGATCCAGCGC
3First_Contig24	F	GTTCGGTGCGGAGCGG
	R	ACTGTACGTTTCTCGTGGTCTCG
3First_Contig14	F	CCCAAGCCGTACCTCCCG
	R	GCCTCCTGAGGTCCCTCC
3Contig88	F	ATCGTTCTTCGACACAGGTTTCC
	R	TATCCGTGGGTTCACTCGCC
3Contig548	F	ACGCACCTGAGAGTCGG
	R	CCCTTTCGGTGGTGTGCA
3Contig400	F	TTAGCCCAGAATCGTCTACTCCG
	R	TTCGTCTGAATTCCCTGCAAGG
4First_Contig45	F	GTAGCAGCAATCTACCACGCC
	R	GCTTTCTTTCCGGTTAACAGAGGC
4First_Contig46	F	TGTGGTCGCAAACAAGAGCC
	R	CTCCGAGACCCGGAAGAATTTT
4First_Contig59	F	TGGTCTCATGGAGGAGAGTCGT
	R	GATGGGTCATTTCTGACGGGATCT
4First_Contig69	F	CAGGCGCTTCAGAGTAGCG
	R	CACGTAGAGCAGTGCCGG
4First_Contig93	F	GTGCTCCGTGTGTTACAAGGAG
	R	GAAACCGGTAAGACCGGTTCC
4First_Contig97	F	CGTCAAAGAACGACAGCAACG
	R	AGGTCCAGTGTGTCCTAAGCT
4First_Contig650	F	GAAAAGAGCGCATTGATGAGCTCG
	R	CAATACCGCTTTCGGAAGATGGAAT
4Contig255	F	ACCTTCTCTCTCCCCTCTCCC
	R	AGGGAGAGGTCTTTGTCTCCG
4Contig581	F	GTCCCCCGCTGAAAAAGCT
	R	GAGAGGCGATGCCAAGAAGT
4Contig639	F	CGATTATTGTCGGGCGGCCA
	R	CTATCCGACCGCATCCCC
4Contig989	F	CGGTTGAATGCTGCGAATTGAAAT
	R	CAAAACAGCCTGGTCTTGAGGC
4Contig1170	F	GTCTCACGCCCGTCCGG
	R	ACCTCACGGAAGGTTCCG
4Contig6818	F	TCTGCCAGCAACGGCCA
	R	GCACGACCGACGAGACCT
4Contig7065	F	TCAGGCAGTCAACACCGTCG
	R	GGGCTACGGTGCTTGGATACG
4Contig12036	F	ACAACTTCCGGGCAAACGG
	R	CTCCGGTTCCGCGTTTCAT

## Sheet: Sheet9
	First_Contig45 F	GTAGCAGCAATCTACCACGCC	2.0 OD	1	PAGE	查看质谱结果
			1管液体
	0.5 * 21 = 10.5		0	0	0	合 计	￥ 10.5
	First_Contig45 R	GCTTTCTTTCCGGTTAACAGAGGC	2.0 OD	1	PAGE	查看质谱结果
				1管液体
	0.5 * 24 = 12		0	0	0	合 计	￥ 12.0
	First_Contig46 F	TGTGGTCGCAAACAAGAGCC	2.0 OD	1	PAGE	查看质谱结果
				1管液体
	0.5 * 20 = 10		0	0	0	合 计	￥ 10.0
	First_Contig46 R	CTCCGAGACCCGGAAGAATTTT	2.0 OD	1	PAGE	查看质谱结果
				1管液体
	0.5 * 22 = 11		0	0	0	合 计	￥ 11.0
	First_Contig59 F	TGGTCTCATGGAGGAGAGTCGT	2.0 OD	1	PAGE	查看质谱结果
				1管液体
	0.5 * 22 = 11		0	0	0	合 计	￥ 11.0
	First_Contig59 R	GATGGGTCATTTCTGACGGGATCT	2.0 OD	1	PAGE	查看质谱结果
				1管液体
	0.5 * 24 = 12		0	0	0	合 计	￥ 12.0
	First_Contig69 F	CAGGCGCTTCAGAGTAGCG	2.0 OD	1	PAGE	查看质谱结果
				1管液体
	0.5 * 19 = 9.5		0	0	0	合 计	￥ 9.5
	First_Contig69 R	CACGTAGAGCAGTGCCGG	2.0 OD	1	PAGE	查看质谱结果
				1管液体
	0.5 * 18 = 9		0	0	0	合 计	￥ 9.0
	First_Contig93 F	GTGCTCCGTGTGTTACAAGGAG	2.0 OD	1	PAGE	查看质谱结果
				1管液体
	0.5 * 22 = 11		0	0	0	合 计	￥ 11.0
	First_Contig93 R	GAAACCGGTAAGACCGGTTCC	2.0 OD	1	PAGE	查看质谱结果
				1管液体
	0.5 * 21 = 10.5		0	0	0	合 计	￥ 10.5
	First_Contig97 F	CGTCAAAGAACGACAGCAACG	2.0 OD	1	PAGE	查看质谱结果
				1管液体
	0.5 * 21 = 10.5		0	0	0	合 计	￥ 10.5
	First_Contig97 R	AGGTCCAGTGTGTCCTAAGCT	2.0 OD	1	PAGE	查看质谱结果
				1管液体
	0.5 * 21 = 10.5		0	0	0	合 计	￥ 10.5
	First_Contig650 F	GAAAAGAGCGCATTGATGAGCTCG	2.0 OD	1	PAGE	查看质谱结果
				1管液体
	0.5 * 24 = 12		0	0	0	合 计	￥ 12.0
	First_Contig650 R	CAATACCGCTTTCGGAAGATGGAAT	2.0 OD	1	PAGE	查看质谱结果
				1管液体
	0.5 * 25 = 12.5		0	0	0	合 计	￥ 12.5
	Contig255 F	ACCTTCTCTCTCCCCTCTCCC	2.0 OD	1	PAGE	查看质谱结果
				1管液体
	0.5 * 21 = 10.5		0	0	0	合 计	￥ 10.5
	Contig255 R	AGGGAGAGGTCTTTGTCTCCG	2.0 OD	1	PAGE	查看质谱结果
				1管液体
	0.5 * 21 = 10.5		0	0	0	合 计	￥ 10.5
	Contig581 F	GTCCCCCGCTGAAAAAGCT	2.0 OD	1	PAGE	查看质谱结果
				1管液体
	0.5 * 19 = 9.5		0	0	0	合 计	￥ 9.5
	Contig581 R	GAGAGGCGATGCCAAGAAGT	2.0 OD	1	PAGE	查看质谱结果
				1管液体
	0.5 * 20 = 10		0	0	0	合 计	￥ 10.0
	Contig639 F	CGATTATTGTCGGGCGGCCA	2.0 OD	1	PAGE	查看质谱结果
				1管液体
	0.5 * 20 = 10		0	0	0	合 计	￥ 10.0
	Contig639 R	CTATCCGACCGCATCCCC	2.0 OD	1	PAGE	查看质谱结果
				1管液体
	0.5 * 18 = 9		0	0	0	合 计	￥ 9.0
	Contig989 F	CGGTTGAATGCTGCGAATTGAAAT	2.0 OD	1	PAGE	查看质谱结果
				1管液体
	0.5 * 24 = 12		0	0	0	合 计	￥ 12.0
	Contig989 R	CAAAACAGCCTGGTCTTGAGGC	2.0 OD	1	PAGE	查看质谱结果
				1管液体
	0.5 * 22 = 11		0	0	0	合 计	￥ 11.0
	Contig1170 F	GTCTCACGCCCGTCCGG	2.0 OD	1	PAGE	查看质谱结果
				1管液体
	0.5 * 17 = 8.5		0	0	0	合 计	￥ 8.5
	Contig1170 R	ACCTCACGGAAGGTTCCG	2.0 OD	1	PAGE	查看质谱结果
				1管液体
	0.5 * 18 = 9		0	0	0	合 计	￥ 9.0
	Contig6818 F	TCTGCCAGCAACGGCCA	2.0 OD	1	PAGE	查看质谱结果
				1管液体
	0.5 * 17 = 8.5		0	0	0	合 计	￥ 8.5
	Contig6818 R	GCACGACCGACGAGACCT	2.0 OD	1	PAGE	查看质谱结果
				1管液体
	0.5 * 18 = 9		0	0	0	合 计	￥ 9.0
	Contig7065 F	TCAGGCAGTCAACACCGTCG	2.0 OD	1	PAGE	查看质谱结果
				1管液体
	0.5 * 20 = 10		0	0	0	合 计	￥ 10.0
	Contig7065 R	GGGCTACGGTGCTTGGATACG	2.0 OD	1	PAGE	查看质谱结果
				1管液体
	0.5 * 21 = 10.5		0	0	0	合 计	￥ 10.5
	Contig12036 F	ACAACTTCCGGGCAAACGG	2.0 OD	1	PAGE	查看质谱结果
				1管液体
	0.5 * 19 = 9.5		0	0	0	合 计	￥ 9.5
	Contig12036 R	CTCCGGTTCCGCGTTTCAT
