# Supplementary material for: Metatranscriptomic Analysis Reveals Rich Mycoviral Diversity in Three Major Fungal Pathogens of Rice
Source: Int J Mol Sci. 2022 Aug 16;23(16):9192. doi: 10.3390/ijms23169192 (PMC9409214; doi:10.3390/ijms23169192)
Supplement: Supplementary file 1 [file ijms-23-09192-s001.zip › Table S3.xlsx]

## Sheet: Sheet1
Table S3. The fungal strains used in this study
Species	Strain	Province	City	Growing condition
Pyricularia oryzae	P1	Hainan	Sanya	Normal
Pyricularia oryzae	P2	Hainan	Sanya	Normal
Pyricularia oryzae	P3	Hainan	Sanya	Normal
Pyricularia oryzae	P4	Hainan	Sanya	Normal
Pyricularia oryzae	P5	Hainan	Sanya	Normal
Pyricularia oryzae	P6	Hainan	Sanya	Normal
Pyricularia oryzae	P7	Hainan	Sanya	Normal
Pyricularia oryzae	P8	Hainan	Sanya	Normal
Pyricularia oryzae	P9	Hainan	Sanya	Normal
Pyricularia oryzae	P10	Hainan	Sanya	Normal
Pyricularia oryzae	P11	Hainan	Ledong	Normal
Pyricularia oryzae	P12	Hainan	Ledong	Normal
Pyricularia oryzae	P13	Hainan	Ledong	Normal
Pyricularia oryzae	P14	Zhejiang	Hangzhou	Normal
Pyricularia oryzae	P15	Hainan	Ledong	Normal
Pyricularia oryzae	P16	Hainan	Ledong	Normal
Pyricularia oryzae	P17	Hainan	Ledong	Normal
Pyricularia oryzae	P18	Zhejiang	Hangzhou	Normal
Pyricularia oryzae	P19	Hainan	Ledong	Normal
Pyricularia oryzae	P20	Hainan	Ledong	Normal
Pyricularia oryzae	P21	Zhejiang	Hangzhou	Normal
Pyricularia oryzae	P22	Hainan	Baoting	Normal
Pyricularia oryzae	P23	Hainan	Baoting	Normal
Pyricularia oryzae	P24	Hainan	Baoting	Normal
Pyricularia oryzae	P25	Hainan	Baoting	Normal
Pyricularia oryzae	P26	Zhejiang	Hangzhou	Normal
Pyricularia oryzae	P27	Hainan	Baoting	Normal
Pyricularia oryzae	P28	Hainan	Baoting	Normal
Pyricularia oryzae	P29	Zhejiang	Hangzhou	Normal
Pyricularia oryzae	P30	Zhejiang	Hangzhou	Normal
Pyricularia oryzae	P31	Hainan	Dingan	Normal
Pyricularia oryzae	P32	Hainan	Dingan	Normal
Pyricularia oryzae	P33	Zhejiang	Hangzhou	Normal
Pyricularia oryzae	P34	Hainan	Dingan	Normal
Pyricularia oryzae	P35	Hainan	Dingan	Normal
Pyricularia oryzae	P36	Hainan	Dingan	Normal
Pyricularia oryzae	P37	Hainan	Dingan	Normal
Pyricularia oryzae	P38	Hainan	Dingan	Normal
Pyricularia oryzae	P39	Hainan	Sanya	Normal
Pyricularia oryzae	P40	Hainan	Sanya	Normal
Pyricularia oryzae	P41	Zhejiang	Hangzhou	Normal
Pyricularia oryzae	P42	Hainan	Tunchang	Normal
Pyricularia oryzae	P43	Zhejiang	Hangzhou	Normal
Pyricularia oryzae	P44	Hainan	Tunchang	Normal
Pyricularia oryzae	P45	Hainan	Tunchang	Normal
Pyricularia oryzae	P46	Hainan	Tunchang	Normal
Pyricularia oryzae	P47	Hainan	Tunchang	Normal
Pyricularia oryzae	P48	Hainan	Tunchang	Normal
Pyricularia oryzae	P49	Hainan	Tunchang	Normal
Pyricularia oryzae	P50	Hainan	Tunchang	Normal
Pyricularia oryzae	P51	Hainan	Qiongzhong	Normal
Pyricularia oryzae	P52	Hainan	Qiongzhong	Normal
Pyricularia oryzae	P53	Zhejiang	Hangzhou	Normal
Pyricularia oryzae	P54	Hainan	Qiongzhong	Normal
Pyricularia oryzae	P55	Hainan	Qiongzhong	Normal
Pyricularia oryzae	P56	Hainan	Qiongzhong	Normal
Pyricularia oryzae	P57	Hainan	Qiongzhong	Normal
Pyricularia oryzae	P58	Hainan	Qiongzhong	Normal
Pyricularia oryzae	P59	Hainan	Qiongzhong	Normal
Pyricularia oryzae	P60	Hainan	Qiongzhong	Normal
Pyricularia oryzae	P61	Zhejiang	Hangzhou	Normal
Pyricularia oryzae	P62	Zhejiang	Hangzhou	Normal
Pyricularia oryzae	P63	Zhejiang	Hangzhou	Normal
Pyricularia oryzae	P64	Zhejiang	Hangzhou	Normal
Pyricularia oryzae	P65	Zhejiang	Hangzhou	Normal
Pyricularia oryzae	P66	Zhejiang	Hangzhou	Normal
Pyricularia oryzae	P67	Zhejiang	Hangzhou	Normal
Pyricularia oryzae	P68	Zhejiang	Hangzhou	Normal
Pyricularia oryzae	P69	Zhejiang	Hangzhou	Normal
Pyricularia oryzae	P70	Zhejiang	Hangzhou	Normal
Pyricularia oryzae	P71	Hunan	Huaihua	Normal
Pyricularia oryzae	P72	Hunan	Huaihua	Normal
Pyricularia oryzae	P73	Hunan	Huaihua	Normal
Pyricularia oryzae	P74	Hunan	Huaihua	Normal
Pyricularia oryzae	P75	Hunan	Huaihua	Normal
Pyricularia oryzae	P76	Hunan	Huaihua	Normal
Pyricularia oryzae	P77	Hunan	Huaihua	Normal
Pyricularia oryzae	P78	Hunan	Huaihua	Normal
Pyricularia oryzae	P79	Hunan	Huaihua	Normal
Pyricularia oryzae	P80	Hunan	Huaihua	Normal
Pyricularia oryzae	P81	Zhejiang	Hangzhou	Abnormal
Pyricularia oryzae	P82	Zhejiang	Hangzhou	Abnormal
Pyricularia oryzae	P83	Zhejiang	Hangzhou	Abnormal
Pyricularia oryzae	P84	Zhejiang	Hangzhou	Abnormal
Pyricularia oryzae	P85	Zhejiang	Hangzhou	Abnormal
Pyricularia oryzae	P86	Zhejiang	Hangzhou	Abnormal
Pyricularia oryzae	P87	Zhejiang	Hangzhou	Abnormal
Pyricularia oryzae	P88	Zhejiang	Hangzhou	Abnormal
Pyricularia oryzae	P89	Zhejiang	Hangzhou	Abnormal
Pyricularia oryzae	P90	Zhejiang	Hangzhou	Abnormal
Pyricularia oryzae	P91	Zhejiang	Hangzhou	Abnormal
Pyricularia oryzae	P92	Zhejiang	Hangzhou	Abnormal
Pyricularia oryzae	P93	Zhejiang	Hangzhou	Abnormal
Pyricularia oryzae	P94	Zhejiang	Hangzhou	Abnormal
Pyricularia oryzae	P95	Zhejiang	Hangzhou	Abnormal
Pyricularia oryzae	P96	Zhejiang	Hangzhou	Abnormal
Pyricularia oryzae	P97	Zhejiang	Hangzhou	Abnormal
Pyricularia oryzae	P98	Zhejiang	Hangzhou	Abnormal
Pyricularia oryzae	P99	Zhejiang	Hangzhou	Abnormal
Pyricularia oryzae	P100	Zhejiang	Hangzhou	Abnormal
Pyricularia oryzae	P101	Zhejiang	Hangzhou	Abnormal
Pyricularia oryzae	P102	Zhejiang	Hangzhou	Abnormal
Pyricularia oryzae	P103	Zhejiang	Hangzhou	Abnormal
Pyricularia oryzae	P104	Zhejiang	Hangzhou	Abnormal
Pyricularia oryzae	P105	Zhejiang	Hangzhou	Abnormal
Pyricularia oryzae	P106	Zhejiang	Hangzhou	Abnormal
Pyricularia oryzae	P107	Zhejiang	Hangzhou	Abnormal
Pyricularia oryzae	P108	Zhejiang	Hangzhou	Abnormal
Pyricularia oryzae	P109	Zhejiang	Hangzhou	Abnormal
Pyricularia oryzae	P110	Zhejiang	Hangzhou	Abnormal
Pyricularia oryzae	P111	Zhejiang	Hangzhou	Abnormal
Pyricularia oryzae	P112	Zhejiang	Hangzhou	Abnormal
Pyricularia oryzae	P113	Zhejiang	Hangzhou	Abnormal
Pyricularia oryzae	P114	Zhejiang	Hangzhou	Abnormal
Pyricularia oryzae	P115	Zhejiang	Hangzhou	Abnormal
Pyricularia oryzae	P116	Zhejiang	Hangzhou	Abnormal
Pyricularia oryzae	P117	Guangdong	Meizhou	Normal
Pyricularia oryzae	P118	Guangdong	Guangzhou	Normal
Rhizoctonia solani	A5	Hainan	Danzhou	Normal
Rhizoctonia solani	A90	Hainan	Danzhou	Abnormal
Rhizoctonia solani	A92	Hainan	Danzhou	Normal
Rhizoctonia solani	A107	Hainan	Ledong	Normal
Rhizoctonia solani	A132	Hainan	Haikou	Normal
Rhizoctonia solani	A142	Hainan	Haikou	Abnormal
Rhizoctonia solani	A154	Hainan	Wenchang	Normal
Rhizoctonia solani	A182	Hainan	Tunchang	Normal
Rhizoctonia solani	B120	Guangdong	Guangzhou	Abnormal
Rhizoctonia solani	B237	Guangdong	Maoming	Abnormal
Rhizoctonia solani	B240	Guangdong	Maoming	Normal
Rhizoctonia solani	B246	Guangdong	Zhanjiang	Normal
Rhizoctonia solani	B249	Guangdong	Zhanjiang	Abnormal
Rhizoctonia solani	B250	Guangdong	Zhanjiang	Normal
Rhizoctonia solani	B255	Guangdong	Zhanjiang	Normal
Rhizoctonia solani	B261	Guangdong	Guangzhou	Normal
Rhizoctonia solani	B265	Guangdong	Guangzhou	Normal
Rhizoctonia solani	B266	Guangdong	Guangzhou	Normal
Rhizoctonia solani	B270	Guangdong	Yunfu	Abnormal
Rhizoctonia solani	B275	Guangdong	Jiangmen	Normal
Rhizoctonia solani	B278	Guangdong	Jiangmen	Normal
Rhizoctonia solani	B297	Guangdong	Lufeng	Abnormal
Rhizoctonia solani	B315	Guangdong	Meizhou	Normal
Rhizoctonia solani	B316	Guangdong	Meizhou	Abnormal
Rhizoctonia solani	B331	Guangdong	Lianzhou	Abnormal
Rhizoctonia solani	C40	Fujian	Fuzhou	Normal
Rhizoctonia solani	D164	Guangxi	Hechi	Normal
Rhizoctonia solani	D168	Guangxi	Yangshuo	Normal
Rhizoctonia solani	D175	Guangxi	Yangshuo	Normal
Rhizoctonia solani	D181	Guangxi	Baise	Abnormal
Rhizoctonia solani	D186	Guangxi	Baise	Normal
Rhizoctonia solani	E51	Yunnan	Dali	Normal
Rhizoctonia solani	GD-2	Guangdong	Lechang	Abnormal
Rhizoctonia solani	GD-11	Guangdong	Shaoguang	Normal
Rhizoctonia solani	GD-61	Guangdong	Guangzhou	Normal
Rhizoctonia solani	GD-118	Guangdong	Zhuhai	Normal
Rhizoctonia solani	H1	Anhui	Xuancheng	Normal
Rhizoctonia solani	H2	Anhui	Caohu	Normal
Rhizoctonia solani	H3	Hunan	Huaihua	Normal
Rhizoctonia solani	N1	Zhejiang	Hangzhou	Normal
Rhizoctonia solani	X-5	Jiangshu	Yangzhou	Normal
Rhizoctonia solani	Y1	Zhejiang	Hangzhou	Normal
Rhizoctonia solani	ZJG-15	Jiangshu	Suzhou	Normal
Ustilaginoidea virens	4	Hainan	Sanya	Abnormal
Ustilaginoidea virens	5	Hainan	Sanya	Normal
Ustilaginoidea virens	6	Hainan	Sanya	Normal
Ustilaginoidea virens	7	Hainan	Sanya	Normal
Ustilaginoidea virens	11	Hainan	Sanya	Abnormal
Ustilaginoidea virens	14	Hainan	Sanya	Normal
Ustilaginoidea virens	16	Hainan	Sanya	Normal
Ustilaginoidea virens	19	Hainan	Sanya	Normal
Ustilaginoidea virens	22	Hainan	Sanya	Normal
Ustilaginoidea virens	23	Hainan	Sanya	Abnormal
Ustilaginoidea virens	24	Hainan	Sanya	Normal
Ustilaginoidea virens	26	Hainan	Sanya	Normal
Ustilaginoidea virens	28	Hainan	Sanya	Normal
Ustilaginoidea virens	32	Hainan	Sanya	Abnormal
Ustilaginoidea virens	33	Hainan	Sanya	Normal
Ustilaginoidea virens	36	Hainan	Sanya	Normal
Ustilaginoidea virens	38	Hainan	Sanya	Normal
Ustilaginoidea virens	44	Hainan	Sanya	Abnormal
Ustilaginoidea virens	46	Hainan	Sanya	Normal
Ustilaginoidea virens	56	Hainan	Sanya	Normal
Ustilaginoidea virens	60	Hainan	Sanya	Normal
Ustilaginoidea virens	62	Hainan	Sanya	Normal
Ustilaginoidea virens	64	Hainan	Sanya	Abnormal
Ustilaginoidea virens	65	Hainan	Sanya	Normal
Ustilaginoidea virens	66	Hainan	Sanya	Normal
Ustilaginoidea virens	67	Hainan	Sanya	Normal
Ustilaginoidea virens	69	Hainan	Sanya	Normal
Ustilaginoidea virens	71	Hainan	Sanya	Abnormal
Ustilaginoidea virens	72	Hainan	Sanya	Normal
Ustilaginoidea virens	73	Hainan	Sanya	Normal
Ustilaginoidea virens	77	Hainan	Sanya	Normal
Ustilaginoidea virens	79	Hainan	Sanya	Abnormal
Ustilaginoidea virens	80	Hainan	Sanya	Normal
Ustilaginoidea virens	83	Hainan	Sanya	Normal
Ustilaginoidea virens	86	Hainan	Sanya	Normal
Ustilaginoidea virens	88	Hainan	Sanya	Normal
Ustilaginoidea virens	192	Hainan	Sanya	Normal
Ustilaginoidea virens	216	Hainan	Sanya	Normal
Ustilaginoidea virens	219	Hainan	Sanya	Normal
Ustilaginoidea virens	231	Hainan	Sanya	Abnormal
Ustilaginoidea virens	232	Hainan	Sanya	Normal
Ustilaginoidea virens	234	Hainan	Sanya	Normal
Ustilaginoidea virens	236	Hainan	Sanya	Abnormal
Ustilaginoidea virens	237	Hainan	Sanya	Normal
Ustilaginoidea virens	238	Hainan	Sanya	Normal
Ustilaginoidea virens	239	Hainan	Sanya	Abnormal
Ustilaginoidea virens	240	Hainan	Sanya	Normal
Ustilaginoidea virens	242	Hainan	Sanya	Abnormal
Ustilaginoidea virens	246	Hainan	Sanya	Normal
Ustilaginoidea virens	249	Hainan	Sanya	Normal
Ustilaginoidea virens	250	Hainan	Sanya	Normal
Ustilaginoidea virens	251	Hainan	Sanya	Normal
Ustilaginoidea virens	252	Hainan	Sanya	Abnormal
Ustilaginoidea virens	253	Hainan	Sanya	Normal
Ustilaginoidea virens	255	Hainan	Sanya	Normal
Ustilaginoidea virens	256	Hainan	Sanya	Abnormal
Ustilaginoidea virens	258	Hainan	Sanya	Normal
Ustilaginoidea virens	259	Hainan	Sanya	Normal
Ustilaginoidea virens	261	Hainan	Sanya	Abnormal
Ustilaginoidea virens	262	Hainan	Sanya	Normal
Ustilaginoidea virens	263	Hainan	Sanya	Abnormal
Ustilaginoidea virens	264	Hainan	Sanya	Normal
Ustilaginoidea virens	265	Hainan	Sanya	Normal
Ustilaginoidea virens	267	Hainan	Sanya	Normal
Ustilaginoidea virens	269	Hainan	Sanya	Normal
Ustilaginoidea virens	270	Hainan	Sanya	Normal
Ustilaginoidea virens	272	Hainan	Sanya	Normal
Ustilaginoidea virens	274	Hainan	Sanya	Normal
Ustilaginoidea virens	275	Hainan	Sanya	Normal
Ustilaginoidea virens	276	Hainan	Sanya	Normal
Ustilaginoidea virens	279	Hainan	Sanya	Normal
Ustilaginoidea virens	282	Hainan	Sanya	Normal
Ustilaginoidea virens	284	Hainan	Sanya	Normal
Ustilaginoidea virens	285	Hainan	Sanya	Abnormal
Ustilaginoidea virens	287	Hainan	Sanya	Abnormal
Ustilaginoidea virens	288	Hainan	Sanya	Normal
Ustilaginoidea virens	291	Hainan	Sanya	Normal
Ustilaginoidea virens	292	Hainan	Sanya	Normal
Ustilaginoidea virens	294	Hainan	Sanya	Normal
Ustilaginoidea virens	297	Hainan	Sanya	Normal
Ustilaginoidea virens	298	Hainan	Sanya	Abnormal
Ustilaginoidea virens	299	Hainan	Sanya	Abnormal
Ustilaginoidea virens	300	Hainan	Sanya	Normal
Ustilaginoidea virens	302	Hainan	Sanya	Abnormal
Ustilaginoidea virens	303	Hainan	Sanya	Normal
Ustilaginoidea virens	304	Hainan	Sanya	Abnormal
Ustilaginoidea virens	305	Hainan	Sanya	Normal
Ustilaginoidea virens	306	Hainan	Sanya	Normal
Ustilaginoidea virens	307	Hainan	Sanya	Abnormal
Ustilaginoidea virens	310	Hainan	Sanya	Abnormal
Ustilaginoidea virens	311	Hainan	Sanya	Normal
Ustilaginoidea virens	314	Hainan	Sanya	Abnormal
Ustilaginoidea virens	316	Hainan	Sanya	Normal
Ustilaginoidea virens	319	Hainan	Sanya	Normal
Ustilaginoidea virens	321	Hainan	Sanya	Normal
Ustilaginoidea virens	322	Hainan	Sanya	Abnormal
Ustilaginoidea virens	325	Hainan	Sanya	Normal
Ustilaginoidea virens	326	Hainan	Sanya	Abnormal
Ustilaginoidea virens	327	Hainan	Sanya	Abnormal
Ustilaginoidea virens	331	Hainan	Sanya	Normal
Ustilaginoidea virens	333	Hainan	Sanya	Abnormal
Ustilaginoidea virens	334	Hainan	Sanya	Normal
Ustilaginoidea virens	336	Hainan	Sanya	Normal
Ustilaginoidea virens	337	Hainan	Sanya	Abnormal
Ustilaginoidea virens	339	Hainan	Sanya	Abnormal
Ustilaginoidea virens	343	Hainan	Sanya	Normal
Ustilaginoidea virens	345	Hainan	Sanya	Normal
Ustilaginoidea virens	347	Hainan	Sanya	Abnormal
Ustilaginoidea virens	349	Hainan	Sanya	Normal
Ustilaginoidea virens	350	Hainan	Sanya	Normal
Ustilaginoidea virens	352	Hainan	Sanya	Abnormal
Ustilaginoidea virens	355	Hainan	Sanya	Normal
Ustilaginoidea virens	358	Hainan	Sanya	Abnormal
Ustilaginoidea virens	359	Hainan	Sanya	Normal
Ustilaginoidea virens	360	Hainan	Sanya	Normal
Ustilaginoidea virens	361	Hainan	Sanya	Abnormal
Ustilaginoidea virens	364	Hainan	Sanya	Normal
Ustilaginoidea virens	366	Hainan	Sanya	Abnormal
Ustilaginoidea virens	367	Hainan	Sanya	Abnormal
Ustilaginoidea virens	369	Hainan	Sanya	Abnormal
Ustilaginoidea virens	370	Hainan	Sanya	Normal
Ustilaginoidea virens	372	Hainan	Sanya	Abnormal
Ustilaginoidea virens	373	Hainan	Sanya	Normal
Ustilaginoidea virens	380	Hainan	Sanya	Abnormal
Ustilaginoidea virens	382	Hainan	Sanya	Abnormal
Ustilaginoidea virens	384	Hainan	Sanya	Abnormal
Ustilaginoidea virens	388	Hainan	Sanya	Abnormal
Ustilaginoidea virens	389	Hainan	Sanya	Abnormal
Ustilaginoidea virens	390	Hainan	Sanya	Normal
Ustilaginoidea virens	391	Hainan	Sanya	Abnormal
Ustilaginoidea virens	393	Hainan	Sanya	Abnormal
Ustilaginoidea virens	396	Hainan	Sanya	Normal
Ustilaginoidea virens	399	Hainan	Sanya	Normal
Ustilaginoidea virens	402	Hainan	Sanya	Abnormal
Ustilaginoidea virens	404	Hainan	Sanya	Abnormal
Ustilaginoidea virens	405	Hainan	Sanya	Normal
Ustilaginoidea virens	406	Hainan	Sanya	Abnormal
Ustilaginoidea virens	411	Hainan	Sanya	Abnormal
Ustilaginoidea virens	412	Hainan	Sanya	Normal
Ustilaginoidea virens	413	Hainan	Sanya	Normal
Ustilaginoidea virens	414	Hainan	Sanya	Abnormal
Ustilaginoidea virens	418	Hainan	Sanya	Abnormal
Ustilaginoidea virens	420	Hainan	Sanya	Normal
Ustilaginoidea virens	423	Hainan	Sanya	Abnormal
Ustilaginoidea virens	425	Hainan	Sanya	Normal
Ustilaginoidea virens	427	Hainan	Sanya	Normal
Ustilaginoidea virens	431	Hainan	Sanya	Abnormal
Ustilaginoidea virens	432	Hainan	Sanya	Normal
Ustilaginoidea virens	443	Hainan	Sanya	Normal
Ustilaginoidea virens	454	Hainan	Sanya	Abnormal
Ustilaginoidea virens	457	Hainan	Sanya	Normal
Ustilaginoidea virens	458	Hainan	Sanya	Abnormal
Ustilaginoidea virens	461	Hainan	Sanya	Normal
Ustilaginoidea virens	462	Hainan	Sanya	Normal
Ustilaginoidea virens	467	Hainan	Sanya	Normal
Ustilaginoidea virens	469	Hainan	Sanya	Normal
Ustilaginoidea virens	472	Hainan	Sanya	Abnormal
Ustilaginoidea virens	474	Hainan	Sanya	Normal
Ustilaginoidea virens	475	Hainan	Sanya	Normal
Ustilaginoidea virens	478	Hainan	Sanya	Normal
Ustilaginoidea virens	480	Hainan	Sanya	Normal
Ustilaginoidea virens	482	Hainan	Sanya	Abnormal
Ustilaginoidea virens	484	Hainan	Sanya	Normal
Ustilaginoidea virens	485	Hainan	Sanya	Normal
Ustilaginoidea virens	486	Hainan	Sanya	Normal
Ustilaginoidea virens	487	Hainan	Sanya	Normal
Ustilaginoidea virens	488	Hainan	Sanya	Abnormal
Ustilaginoidea virens	489	Hainan	Sanya	Normal
Ustilaginoidea virens	490	Hainan	Sanya	Normal
Ustilaginoidea virens	498	Hainan	Sanya	Normal
Ustilaginoidea virens	U1	Hainan	Ledong	Normal
Ustilaginoidea virens	U11	Hainan	Ledong	Abnormal
Ustilaginoidea virens	U14	Hainan	Ledong	Normal
Ustilaginoidea virens	U16	Hainan	Lingshui	Normal
Ustilaginoidea virens	U22	Hainan	Lingshui	Normal
Ustilaginoidea virens	U23	Hainan	Lingshui	Normal
Ustilaginoidea virens	U25	Hainan	Lingshui	Normal
Ustilaginoidea virens	U34	Hainan	Sanya	Normal
Ustilaginoidea virens	U39	Hainan	Sanya	Normal
Ustilaginoidea virens	U42	Hainan	Sanya	Abnormal
Ustilaginoidea virens	U43	Hainan	Sanya	Normal
Ustilaginoidea virens	U45	Hainan	Sanya	Normal
